# Supplementary material for: LVS‐HARMED Risk Score for Incident Heart Failure in Patients With Atrial Fibrillation Who Present to the Emergency Department: Data from a World‐Wide Registry
Source: PubMed Central journal article supplement — J Am Heart Assoc. 2021 Sep 13;10(18):e017735. doi: 10.1161/JAHA.120.017735 (PMC8649506; doi:10.1161/jaha.120.017735), 2021-09-13

# **SUPPLEMENTAL MATERIAL**

**Table S1. Baseline Characteristics and Medical History, by hospitalization for heart failure status.**

| Baseline characteristics and medical history                                           | Overall     | No HF during follow up | With HF during follow-up | P-value |
|----------------------------------------------------------------------------------------|-------------|------------------------|--------------------------|---------|
| Number of Patients - with follow-up data                                               | N=9765      | N=9101                 | N=664                    |         |
| Age(yrs), mean±SD                                                                      | 64.9±14.9   | 64.7±14.7              | 68.2±16.5                | <0.001  |
| Sex (male), , %                                                                        | 53.8        | 54.3                   | 46.5                     | <0.001  |
| Weight (kg), mean±SD                                                                   | 73.1±19.3   | 73.4±19.2              | 69.2±19.5                | <0.001  |
| Height (cm), mean±SD                                                                   | 166.6±10.5  | 166.8±10.5             | 163.8±11.3               | <0.001  |
| BMI (kg/m2), mean±SD                                                                   | 26.2±5.8    | 26.2±5.8               | 25.6±5.9                 | 0.006   |
| Systolic Blood Pressure(mmHg), mean±SD                                                 | 133.0±24.5  | 133.1±24.3             | 132.0±26.4               | 0.329   |
| Diastolic Blood Pressure(mmHg), mean±SD                                                | 80.5±15.0   | 80.6±15.0              | 79.0±15.8                | 0.009   |
| Heart Rate (bpm), mean±SD                                                              | 103.4±31.0  | 103.6±31.0             | 101.5±30.8               | 0.090   |
| Prior diagnosis of Atrial Fibrillation, %                                              | 59.1        | 58.8                   | 64.3                     | 0.007   |
| - Paroxysmal, %*                                                                       | 35.6        | 36.4                   | 25.3                     | <.001   |
| - Persistent, %*                                                                       | 23.7        | 24.2                   | 17.3                     | 0.001   |
| - Permanent, %*                                                                        | 40.7        | 39.4                   | 57.4                     | <.001   |
| Current arrhythmia                                                                     |             |                        |                          |         |
| - Atrial Fibrillation, %                                                               | 92.3        | 92.2                   | 93.1                     | 0.416   |
| - Atrial Flutter, %                                                                    | 7.7         | 7.8                    | 6.9                      | 0.421   |
| Patient in atrial fibrillation/atrial flutter when left ED, %                          | 73.0        | 72.2                   | 83.7                     | <0.001  |
| Repeat visits for atrial fibrillation/atrial flutter complications during study period | 16.8        | 15.3                   | 36.9                     | <0.001  |
| History of                                                                             |             |                        |                          |         |
| - Myocardial infarction, %                                                             | 11.2        | 10.8                   | 17.3                     | <0.001  |
| - Coronary artery disease, %                                                           | 25.5        | 24.6                   | 37.2                     | <0.001  |
| - Hypertension, %                                                                      | 59.2        | 58.8                   | 65.8                     | <0.001  |
| - Stroke/transient ischemic attack, %                                                  | 13.2        | 13.0                   | 15.7                     | 0.053   |
| - Rheumatic heart disease, %                                                           | 10.7        | 10.3                   | 15.5                     | <0.001  |
| - Significant Valvular heart disease, %                                                | 18.3        | 17.8                   | 25.2                     | <0.001  |
| - Emphysema/chronic obstructive pulmonary disease, %                                   | 8.0         | 7.7                    | 11.9                     | <0.001  |
| - Diabetes mellitus, %                                                                 | 19.5        | 19.0                   | 26.1                     | <0.001  |
| - Permanent pacemaker, %                                                               | 3.8         | 3.7                    | 5.1                      | 0.060   |
| - Left ventricular hypertrophy, %                                                      | 17.6        | 17.0                   | 26.7                     | <0.001  |
| Tobacco use, %                                                                         | 16.0        | 15.8                   | 19.3                     | 0.018   |
| Alcohol use - # standard drinks/week, (median) mean±SD deviation                       | (0)3.3±7.66 | (0)3.4±7.74            | (0)3.1±6.09              | 0.644   |
| <b>Prior interventions</b>                                                             |             |                        |                          |         |
| Beta blocker, %                                                                        | 53.2        | 53.0                   | 55.9                     | 0.150   |
| Calcium channel blocker, %                                                             | 27.7        | 27.6                   | 29.4                     | 0.314   |
| Angiotensin converting enzyme-inhibitor, %                                             | 27.6        | 27.0                   | 36.7                     | <.0001  |

|                                                                    |      |      |      |        |
|--------------------------------------------------------------------|------|------|------|--------|
| Angiotensin receptor blocker, %                                    | 15.3 | 15.5 | 13.0 | 0.078  |
| Digoxin, %                                                         | 25.6 | 24.9 | 36.1 | <.0001 |
| Diuretic, %                                                        | 41.0 | 39.7 | 58.1 | <.0001 |
| Amiodarone, %                                                      | 14.8 | 14.3 | 21.5 | <.0001 |
| Sotalol, %                                                         | 3.2  | 3.3  | 1.1  | 0.001  |
| Flecainide, %                                                      | 1.6  | 1.7  | 0    | 0.001  |
| Prior cardioversions, %                                            | 11.3 | 11.3 | 11.0 | 0.793  |
| Prior atrial fibrillation catheter, surgical or Maze procedures, % | 2.5  | 2.6  | 1.1  | 0.014  |
| Prior AV-node ablation, %                                          | 0.5  | 0.5  | 0.9  | 0.129  |
| Prior left atrial appendage occlusion or amputation, %             | 0.1  | 0.1  | 0    | 0.370  |
| <b>Medication use after emergency department visit</b>             |      |      |      |        |
| Beta blocker, %                                                    | 53.2 | 53.0 | 55.9 | 0.150  |
| Calcium channel blocker, %                                         | 27.7 | 27.6 | 29.4 | 0.314  |
| Angiotensin converting enzyme-inhibitor, %                         | 27.6 | 27.0 | 36.7 | <.0001 |
| Angiotensin receptor blocker, %                                    | 15.3 | 15.5 | 13.0 | 0.078  |
| Digoxin, %                                                         | 25.6 | 24.9 | 36.1 | <.0001 |
| Diuretic, %                                                        | 41.0 | 39.7 | 58.1 | <.0001 |
| Amiodarone, %                                                      | 14.8 | 14.3 | 21.5 | <.0001 |
| Sotalol, %                                                         | 3.2  | 3.3  | 1.1  | 0.001  |
| Flecainide, %                                                      | 1.6  | 1.7  | 0    | 0.001  |

SD= Standard deviation

\* Based on the total number of patients with prior atrial fibrillation.

**Table S2. Calibration table for the LVS-HARMED score in AFFORD.**

| Predicted probability | N   | Observed, n (%) | Expected, n (%) |
|-----------------------|-----|-----------------|-----------------|
| 0-0.019               | 129 | 1 (0.8)         | 5.1 (3.9)       |
| 0.02-0.04             | 207 | 13 (6.2)        | 9.1 (4.4)       |
| 0.04-0.06             | 20  | 1 (5.0)         | 1.3 (6.7)       |
| 0.06-0.08             | 6   | 1 (16.7)        | 0.5 (8.9)       |
| Total                 | 367 | 17 (4.6)        | 17.0 (4.6)      |

Hosmer Lemeshow p = 0.22

**Table S3. Odds ratios for LVS-HARMED score components across country income groups.**

|                              | Low income countries*              |         | Lower-middle income countries <sup>†</sup> |         | Upper-middle income countries <sup>‡</sup> |         | High income countries <sup>§</sup> |         |
|------------------------------|------------------------------------|---------|--------------------------------------------|---------|--------------------------------------------|---------|------------------------------------|---------|
|                              | Odds Ratio (95% CI)                | P-value | Odds Ratio (95% CI)                        | P-value | Odds Ratio (95% CI)                        | P-value | Odds Ratio (95% CI)                | P-value |
| Left ventricular hypertrophy | 0.797 (0.135-4.708)                | 0.7112  | 1.058 (0.472-2.371)                        | 0.8646  | 1.407 (0.865-2.289)                        | 0.1517  | 1.609 (1.214-2.134)                | 0.0021  |
| Valvular heart disease       | 2.308 (0.309-17.23)                | 0.2773  | 1.118 (0.504-2.478)                        | 0.7171  | 0.741 (0.338-1.627)                        | 0.4195  | 1.948 (1.356-2.797)                | 0.0010  |
| Smoking/other tobacco use    | 2.210 (0.261-18.70)                | 0.3225  | 2.444 (1.039-5.751)                        | 0.0441  | 1.172 (0.713-1.928)                        | 0.4999  | 1.474 (1.074-2.023)                | 0.0186  |
| Height, per cm               | 0.994 (0.952-1.037)                | 0.7727  | 0.961 (0.940-0.981)                        | 0.0002  | 0.979 (0.959-1.000)                        | 0.0468  | 0.983 (0.972-0.995)                | 0.0068  |
| Age, per year                | 1.008 (0.978-1.038)                | 0.6088  | 1.010 (0.995-1.026)                        | 0.1807  | 1.024 (1.009-1.040)                        | 0.0019  | 1.036 (1.024-1.048)                | <.0001  |
| Rheumatic heart disease      | 1.129 (0.092-13.91)                | 0.8877  | 2.006 (0.762-5.285)                        | 0.1061  | 2.385 (1.029-5.529)                        | 0.0440  | 1.383 (0.698-2.742)                | 0.3329  |
| Myocardial infarction        | 2.764 (0.000-36x10 <sup>^4</sup> ) | 0.5274  | 2.191 (0.616-7.794)                        | 0.1171  | 1.769 (0.974-3.210)                        | 0.0591  | 1.727 (1.250-2.384)                | 0.0020  |
| ED discharge rhythm is AF    | 0.486 (0.039-6.048)                | 0.3436  | 2.582 (1.089-6.121)                        | 0.0369  | 1.682 (1.035-2.734)                        | 0.0381  | 1.809 (1.291-2.534)                | 0.0015  |
| Diabetes mellitus            | 0.539 (0.017-17.00)                | 0.5214  | 1.092 (0.512-2.329)                        | 0.7632  | 1.579 (1.006-2.477)                        | 0.0474  | 1.369 (1.036-1.808)                | 0.0290  |

\* Includes Tanzania, Kenya, Mozambique, and Uganda; 193 subjects and 54 events.

<sup>†</sup>Includes India, Sudan, Senegal, Zambia, Cameroon, Nigeria, Egypt, and the Ukraine; 2246 subjects and 119 events.

<sup>‡</sup> Includes Argentina, Brazil, Colombia, Ecuador, Venezuela, Chile, Russia, Latvia, Turkey, Iran, South Africa, Thailand and China; 2358 subjects and 163 events.

<sup>§</sup> Includes Japan, South Korea, Singapore, Saudi Arabia, the United Arab Emirates, Poland, Slovakia, Hungary, the Czech Republic, Bulgaria, Australia, Spain, Italy, the Netherlands, Germany, Austria, the United Kingdom, Sweden, Ireland, Canada, Denmark and the United States of America; 4968 subjects and 328 events.

**Table S4. Odds ratios for LVS-HARMED coefficients in a model that also includes medication use after emergency department discharge.**

|                                             | $\beta$ | Odds Ratio (95% CI)  | P-value |
|---------------------------------------------|---------|----------------------|---------|
| Intercept                                   | -1.117  |                      | 0.2134  |
| Left ventricular hypertrophy                | 0.377   | 1.458 (1.175- 1.809) | 0.0010  |
| Valvular heart disease                      | 0.270   | 1.309 (0.994- 1.725) | 0.0552  |
| Smoking/other tobacco use                   | 0.324   | 1.383 (1.096- 1.746) | 0.0075  |
| Height, per 3 cms                           | -0.070  | 0.932 (0.907- 0.959) | <.0001  |
| Age, per 5 years                            | 0.099   | 1.104 (1.064- 1.146) | <.0001  |
| Rheumatic heart disease                     | 0.480   | 1.616 (1.135- 2.300) | 0.0091  |
| Myocardial infarction                       | 0.587   | 1.799 (1.403- 2.307) | <.0001  |
| ED discharge rhythm is AF                   | 0.501   | 1.650 (1.296- 2.101) | 0.0001  |
| Diabetes mellitus                           | 0.242   | 1.273 (1.032- 1.572) | 0.0256  |
| Diuretic after ED                           | 0.640   | 1.896 (1.555- 2.313) | <.0001  |
| Calcium channel blocker (any) after ED      | -0.031  | 0.970 (0.797- 1.180) | 0.7551  |
| Beta blocker after ED                       | 0.094   | 1.099 (0.913- 1.323) | 0.3110  |
| Angiotensin Receptor blocker (ARB) after ED | -0.318  | 0.728 (0.556- 0.954) | 0.0223  |
| ACE-inhibitor after ED                      | 0.042   | 1.043 (0.848- 1.282) | 0.6842  |
| Digoxin after ED                            | 0.267   | 1.307 (1.066- 1.602) | 0.0113  |

Figure S1. Calibration plot for the LVS-HARMED score in the RE-LY registry.

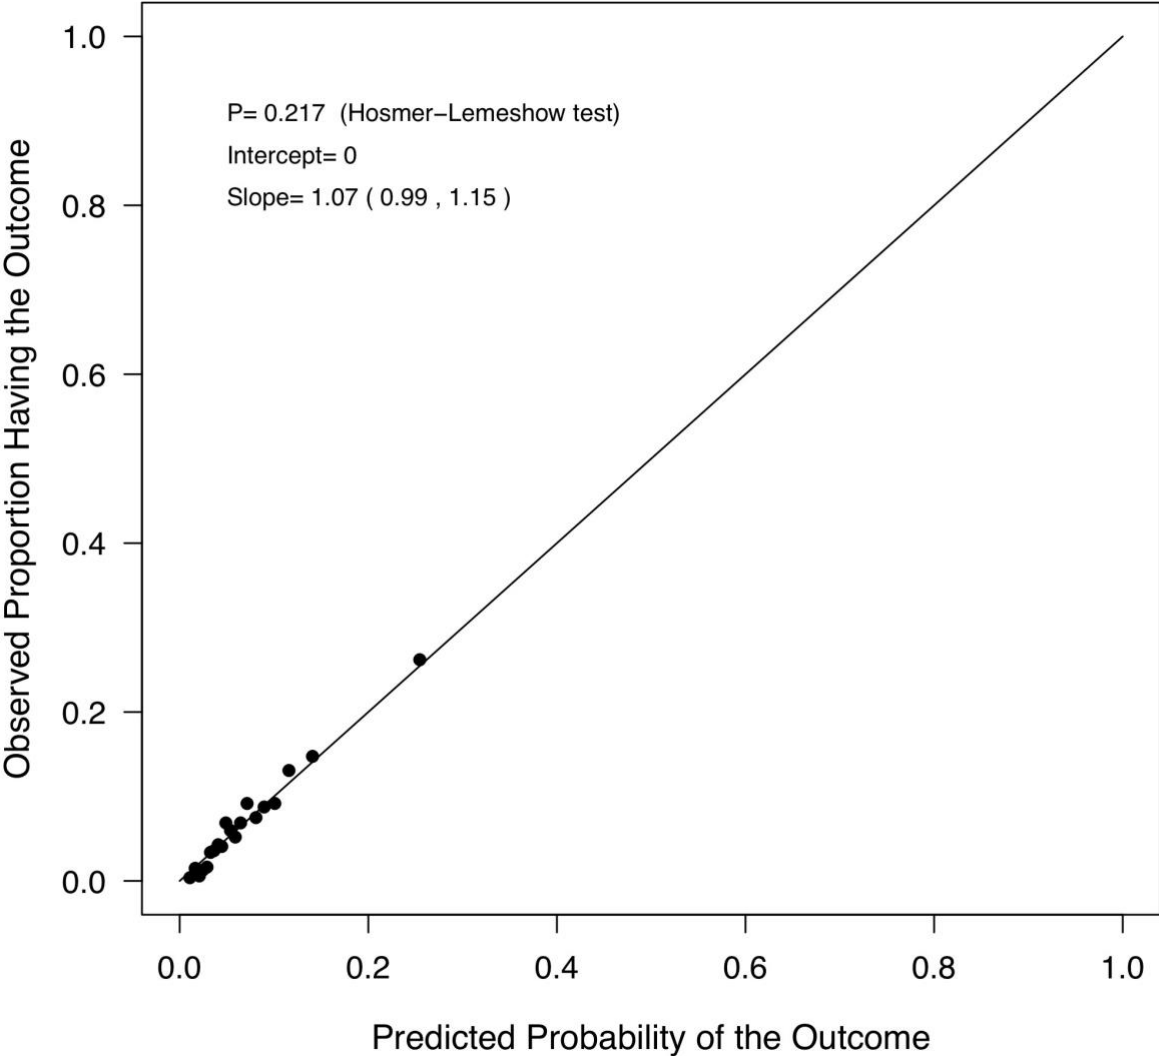

Figure S2. Calibration plot for the LVS-HARMED score in the Atrial Fibrillation and Flutter Outcomes & Risk Determination (AFFORD) study study.

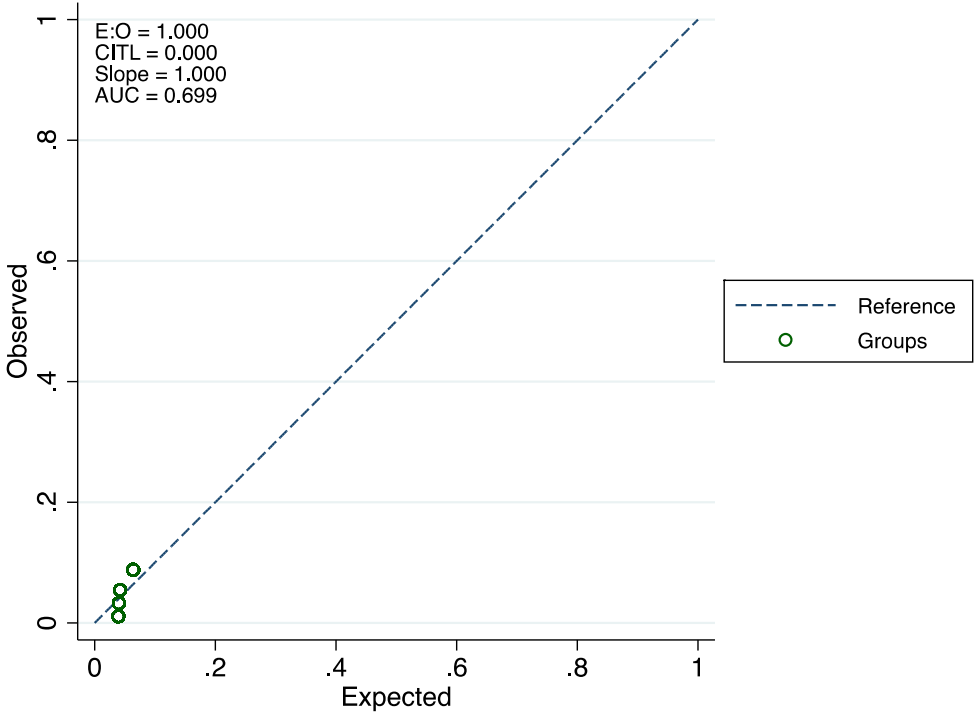

E:O = Expected vs observed ratio  
CITL = Calibration in the large  
AUC= Area under the curve



**Figure S3. Receiver operator characteristic (ROC) curve for the LVS-HARMED score in the full RE-LY registry.**

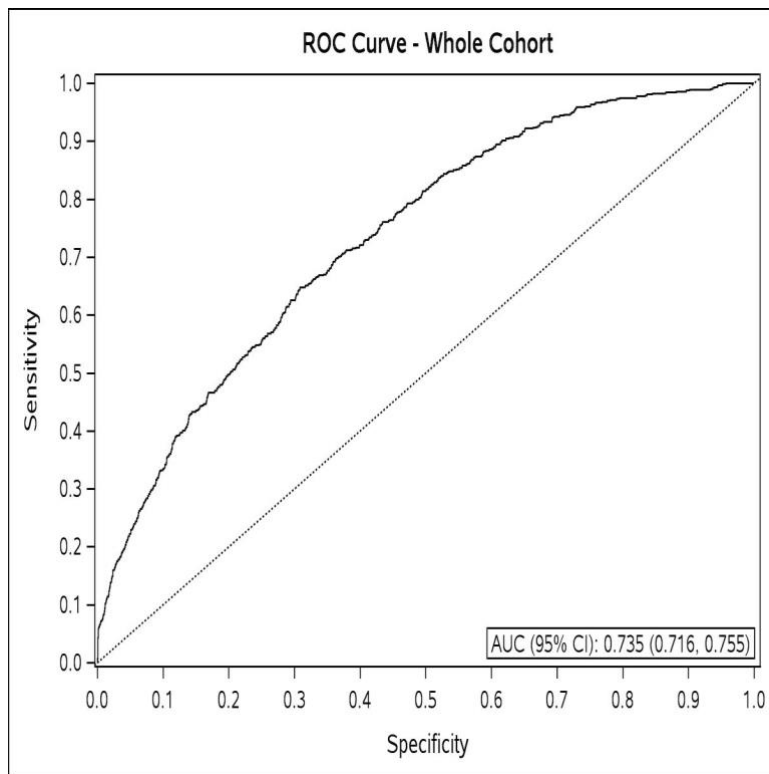

**Figure S4. Receiver operator characteristic (ROC) curve for the LVS-HARMED score in low income countries.**

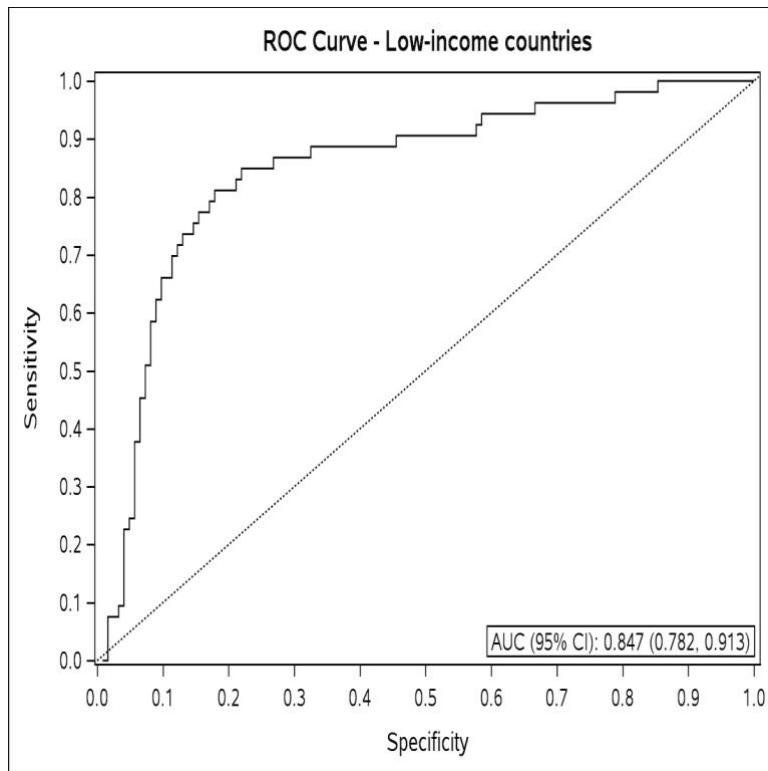

**Figure S5. Receiver operator characteristic (ROC) curve for the LVS-HARMED score in lower-middle income countries.**

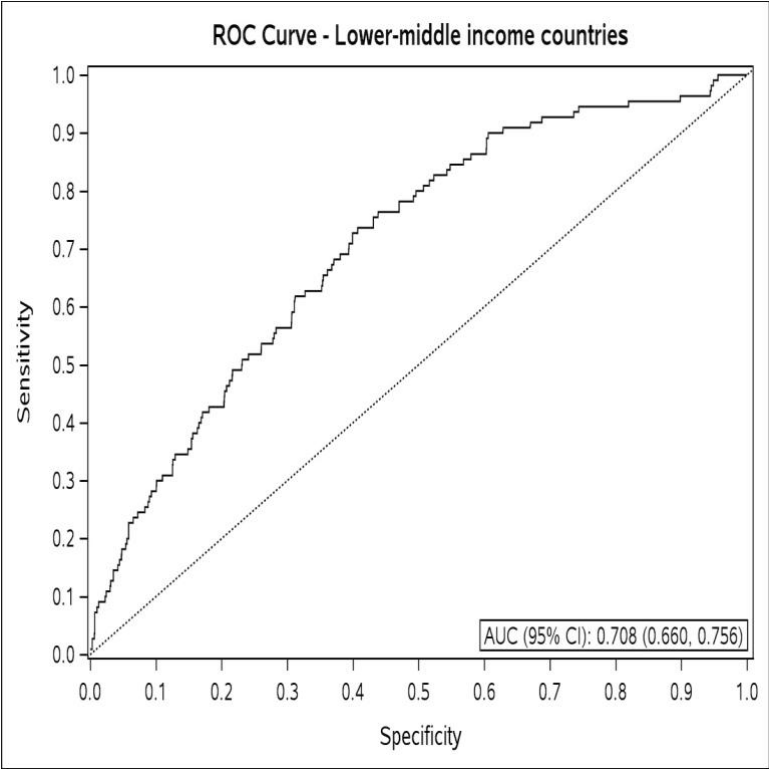

**Figure S6. Receiver operator characteristic (ROC) curve for the LVS-HARMED score in upper-middle income countries.**

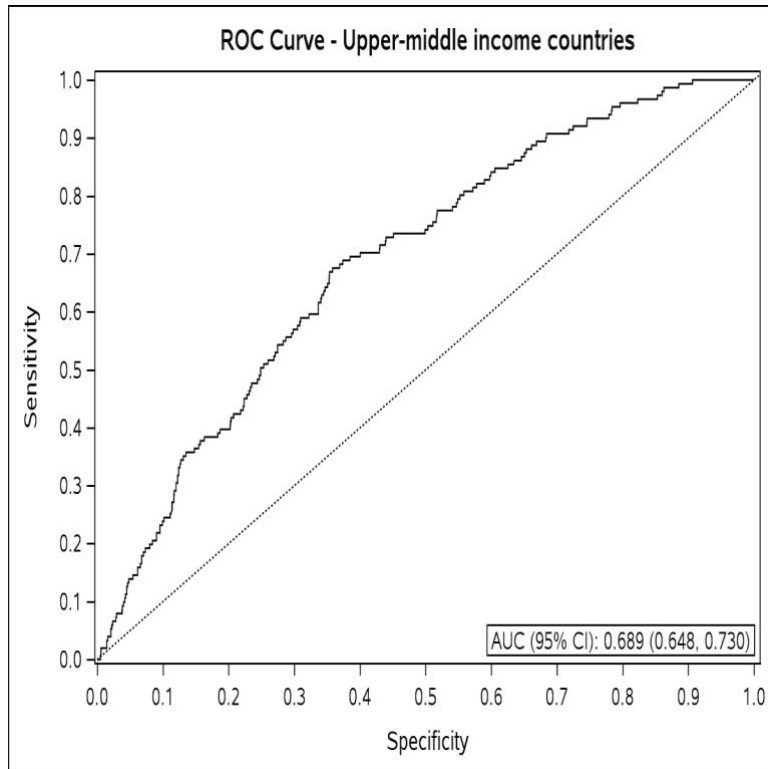

**Figure S7. Receiver operator characteristic (ROC) curve for the LVS-HARMED score in high income countries.**

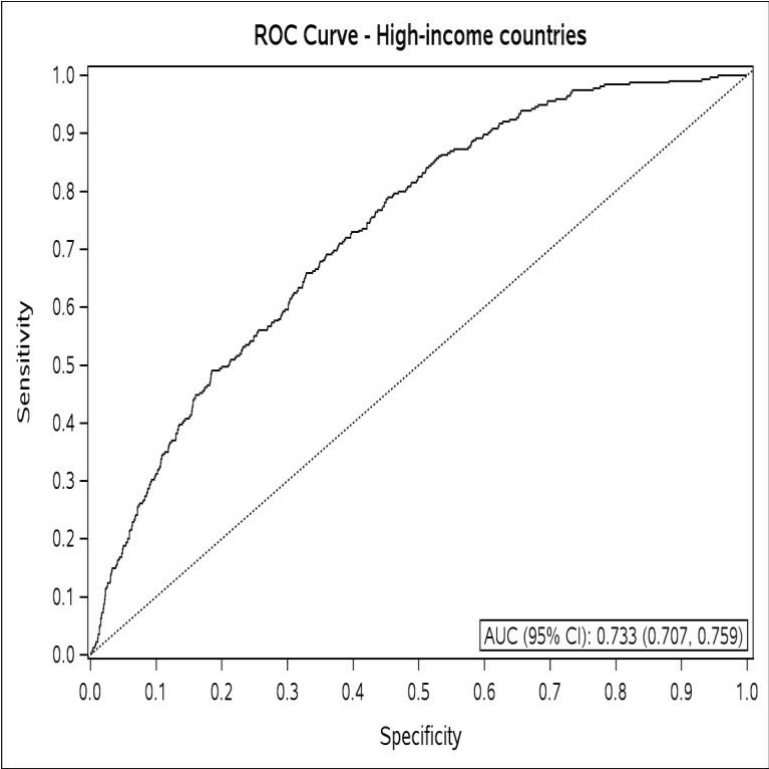

Figure S8. Agreement plot for the LVS-HARMED and FHS scores.

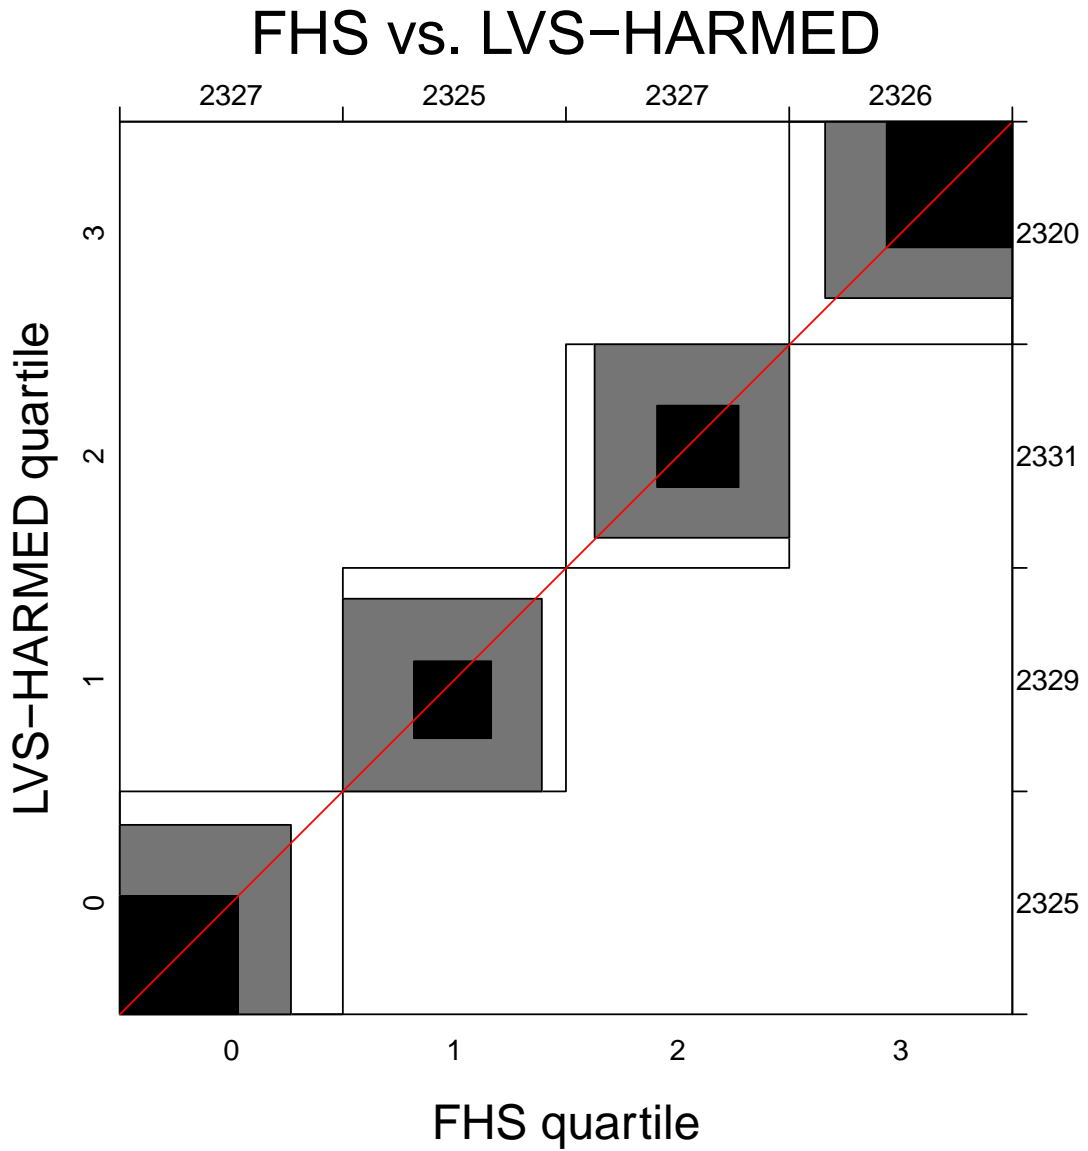

Bangdiwala statistics for the agreement between LVS-HARMED and FHS scores= 0.654

Black squares denote observed agreement, grey squares denote partial agreement and white squares denote the total within each quartile.

Figure S9. Calibration plot for the LVS-HARMED score in low income countries.

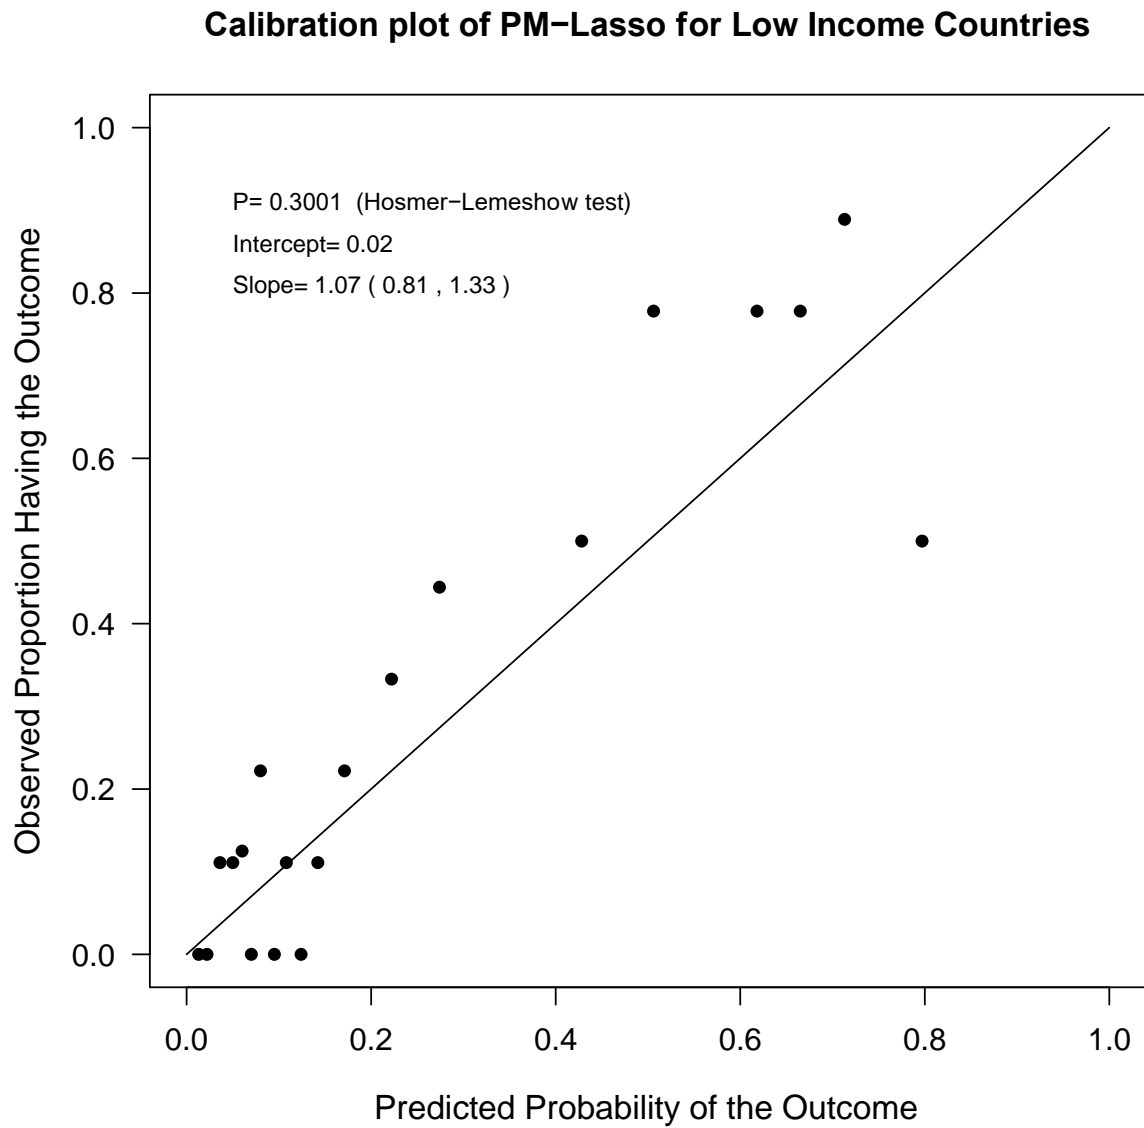

**Figure S10. Calibration plot for the LVS-HARMED score in lower-middle income countries**

**Calibration plot of PM-Lasso for Lower-middle Income Countries**

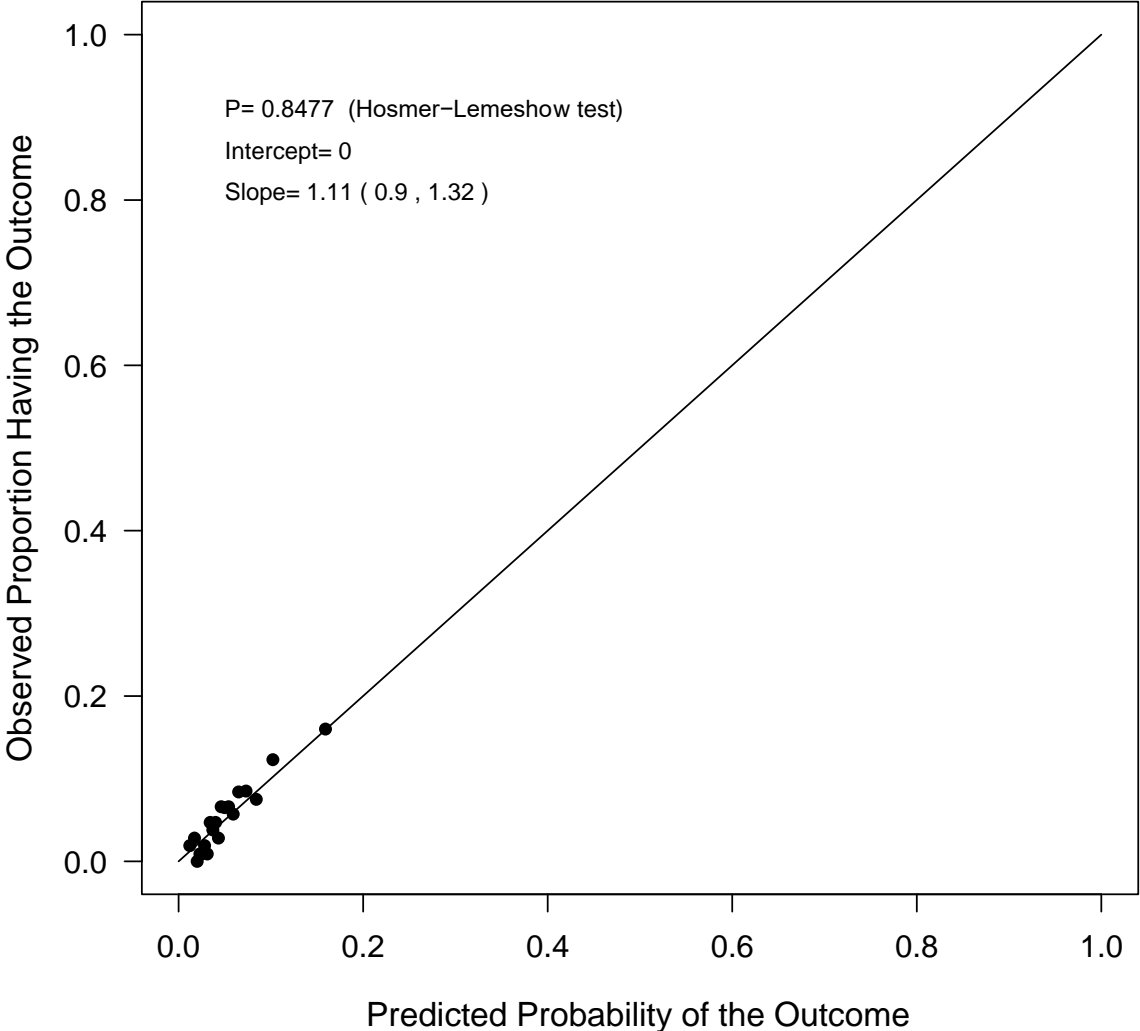



**Figure S11. Calibration plot for the LVS-HARMED score in upper-middle income countries.**

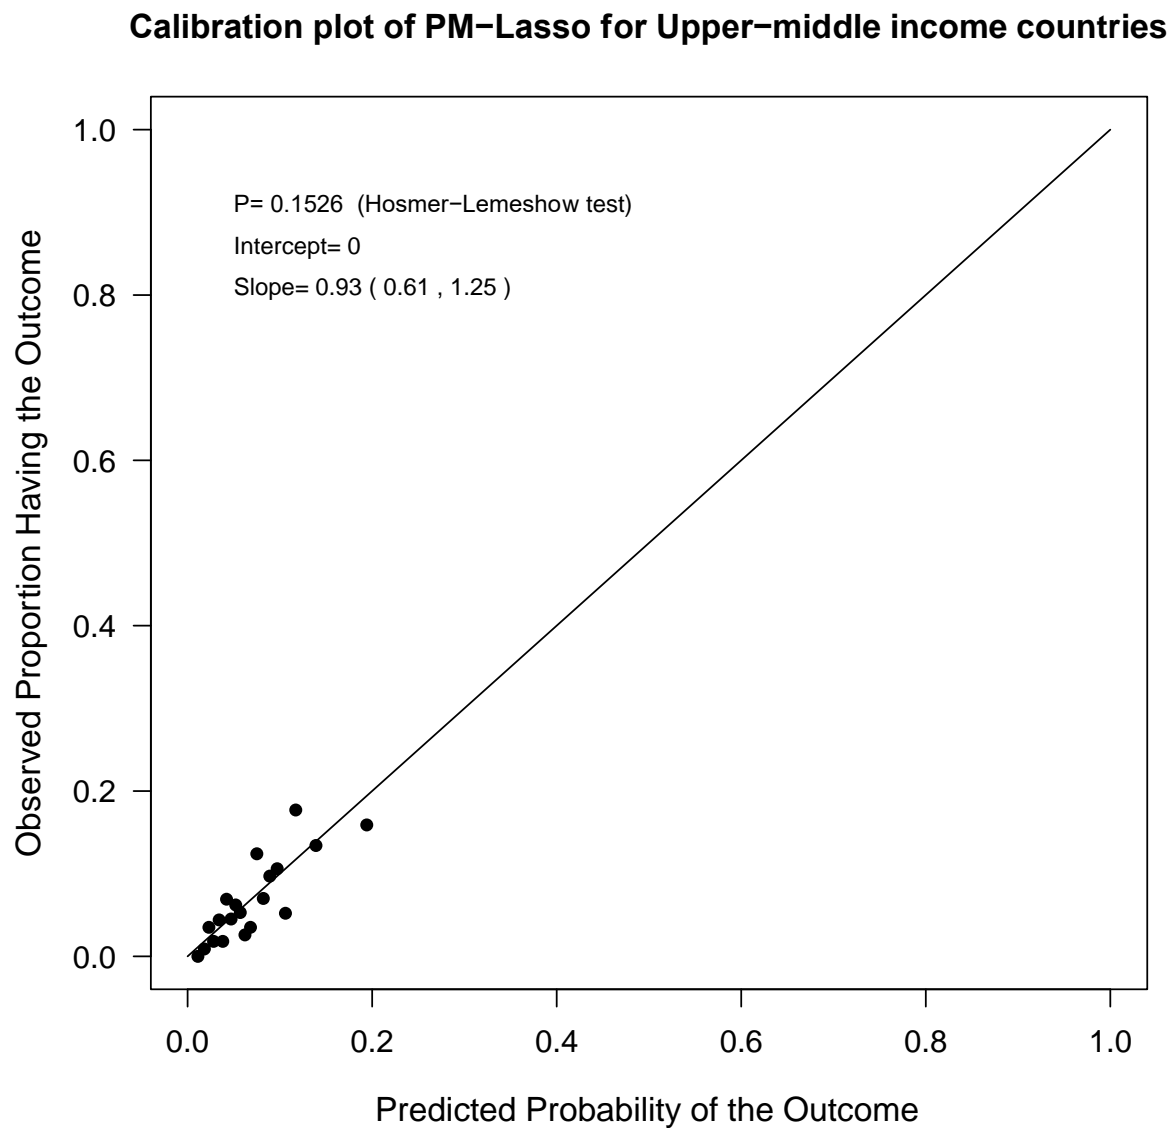

Figure S12. Calibration plot for the LVS-HARMED score in high income countries.

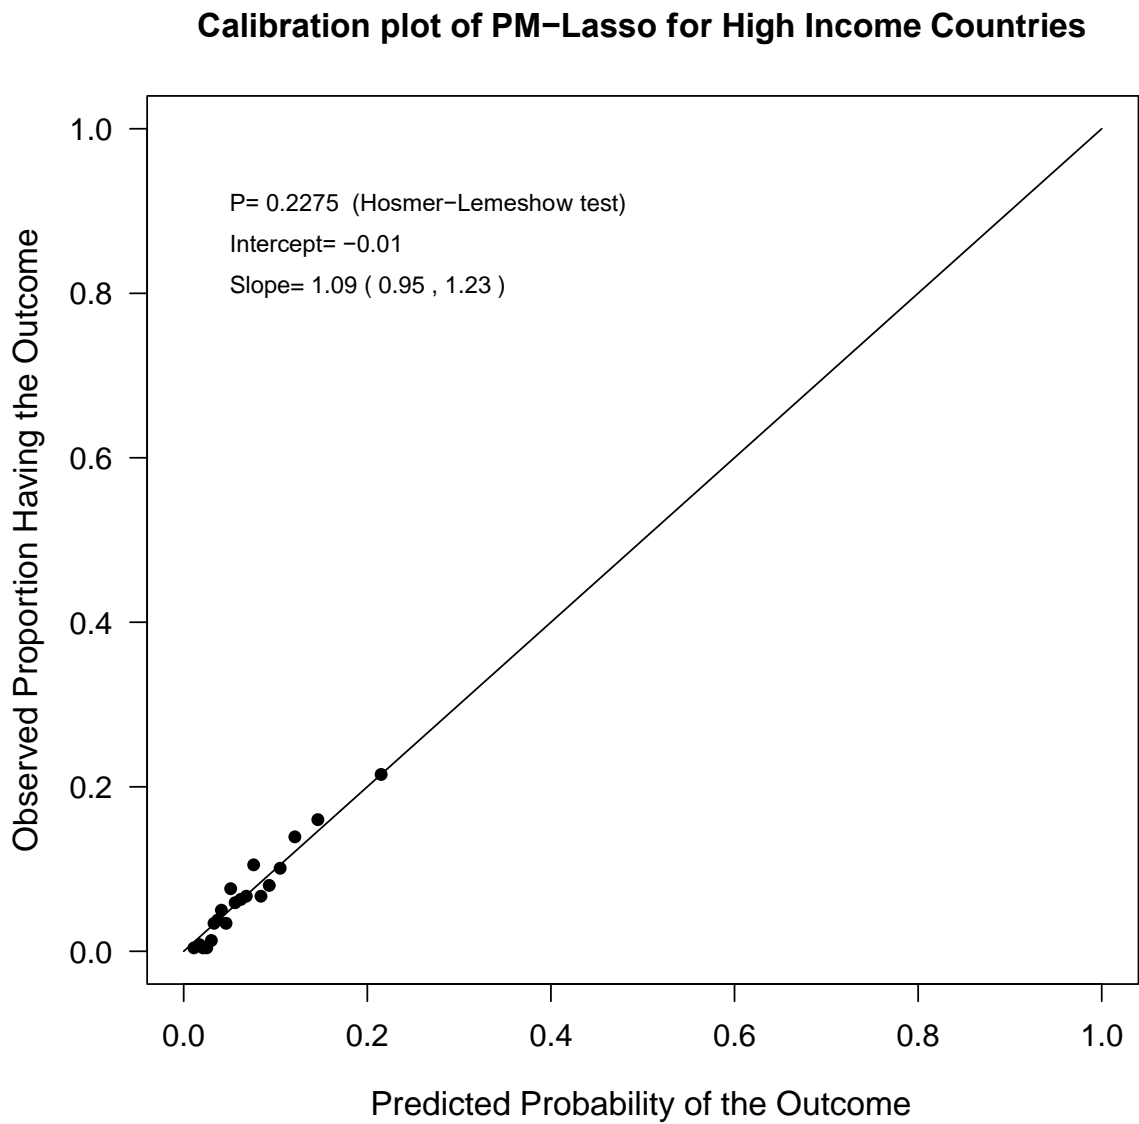

Supplement: JAH3-10-e017735-s001.pdf [file JAH3-10-e017735-s001.pdf]
